# Supplementary material for: Spliceator: multi-species splice site prediction using convolutional neural networks
Source: Springer Nature journal article supplement (doi:10.1186/s12859-021-04471-3), 2021-11-23
Supplement: 12859_2021_4471_MOESM1_ESM.pdf [file 12859_2021_4471_MOESM1_ESM.pdf]

|          |    | 1  | 2     | 3     | 4     | 5     | 6     | 7     | 8     | 9     | 10    | Avg.  | Std. dev |      |
|----------|----|----|-------|-------|-------|-------|-------|-------|-------|-------|-------|-------|----------|------|
| Donor    | AS | 0  | 92.62 | 92.33 | 93.35 | 93.71 | 93.33 | 92.85 | 92.81 | 92.60 | 93.67 | 93.59 | 93.09    | 0.50 |
|          |    | 1  | 93.44 | 93.02 | 93.73 | 93.98 | 94.25 | 93.92 | 94.32 | 94.00 | 94.40 | 94.46 | 93.95    | 0.46 |
|          |    | 2  | 94.20 | 92.92 | 94.27 | 93.75 | 94.18 | 94.96 | 93.57 | 93.35 | 94.15 | 93.43 | 93.88    | 0.59 |
|          |    | 10 | 97.33 | 97.45 | 97.41 | 97.65 | 96.99 | 97.33 | 97.36 | 97.10 | 97.27 | 97.37 | 97.33    | 0.18 |
|          | GS | 0  | 93.44 | 94.03 | 93.80 | 93.90 | 94.63 | 94.31 | 94.28 | 94.36 | 94.59 | 93.78 | 94.11    | 0.39 |
|          |    | 1  | 95.71 | 95.59 | 95.09 | 95.53 | 95.18 | 95.02 | 95.55 | 95.36 | 95.48 | 94.86 | 95.34    | 0.28 |
|          |    | 2  | 95.22 | 95.53 | 94.86 | 95.70 | 94.66 | 94.80 | 94.71 | 95.29 | 95.15 | 95.19 | 95.11    | 0.35 |
|          |    | 10 | 97.79 | 97.85 | 97.87 | 97.71 | 97.53 | 97.79 | 97.62 | 97.77 | 97.30 | 97.57 | 97.68    | 0.18 |
| Acceptor | AS | 0  | 92.21 | 93.05 | 92.82 | 91.25 | 92.21 | 91.86 | 92.13 | 91.00 | 92.09 | 91.31 | 91.99    | 0.66 |
|          |    | 1  | 93.22 | 92.86 | 91.61 | 93.40 | 92.07 | 92.36 | 92.88 | 92.69 | 92.00 | 93.15 | 92.62    | 0.59 |
|          |    | 2  | 94.35 | 93.95 | 93.55 | 93.28 | 92.85 | 94.01 | 93.95 | 93.74 | 92.73 | 94.58 | 93.70    | 0.60 |
|          |    | 10 | 97.17 | 97.48 | 97.23 | 97.06 | 97.07 | 97.23 | 97.17 | 97.33 | 96.92 | 97.08 | 97.17    | 0.16 |
|          | GS | 0  | 93.53 | 92.78 | 92.19 | 93.01 | 92.59 | 93.34 | 93.37 | 92.62 | 91.48 | 92.41 | 92.73    | 0.62 |
|          |    | 1  | 94.41 | 94.00 | 94.46 | 94.25 | 94.41 | 94.00 | 94.23 | 94.21 | 94.12 | 93.80 | 94.19    | 0.21 |
|          |    | 2  | 94.47 | 93.14 | 94.79 | 94.50 | 94.49 | 93.59 | 94.73 | 94.10 | 95.11 | 93.96 | 94.29    | 0.60 |
|          |    | 10 | 97.26 | 97.38 | 97.54 | 97.59 | 97.60 | 97.35 | 97.47 | 97.54 | 97.21 | 97.53 | 97.45    | 0.14 |

Table S1 – Prediction accuracy for donor and acceptor SS, using the AS and GS datasets (AS/GS\_0 = positive/negative ratio of 1:1 with only FP sequences in negative subset; AS/GS\_1 = positive/negative ratio of 1:1 with exon, intron and FP sequences; AS/GS\_2 = positive/negative ratio of 1:2 with only FP sequences in negative subset; AS/GS\_10 = positive/negative ratio of 1:10 with only FP sequences in negative subset), with an input sequence length of 200 nt.

| SS       | Dataset comparison | P-value               | Significant |
|----------|--------------------|-----------------------|-------------|
| Donor    | AS_0 vs GS_0       | $1.23 \times 10^{-5}$ | ***         |
|          | AS_1 vs GS_1       | $5.88 \times 10^{-9}$ | ***         |
|          | AS_2 vs GS_2       | $3.7 \times 10^{-6}$  | ***         |
|          | AS_10 vs GS_10     | $9.13 \times 10^{-5}$ | ***         |
| Acceptor | AS_0 vs GS_0       | $1.0 \times 10^{-2}$  | ***         |
|          | AS_1 vs GS_1       | $3.09 \times 10^{-8}$ | ***         |
|          | AS_2 vs GS_2       | $2.4 \times 10^{-2}$  | **          |
|          | AS_10 vs GS_10     | $1.87 \times 10^{-4}$ | ***         |

Table S2 - Statistical analysis with unpaired t-tests for difference between average prediction accuracy for donor and acceptor SS using AS and GS datasets (from Table S1) (\*\*: p-value < 0.01 and \*\*\*: p-value < 0.001).

## A) Donor

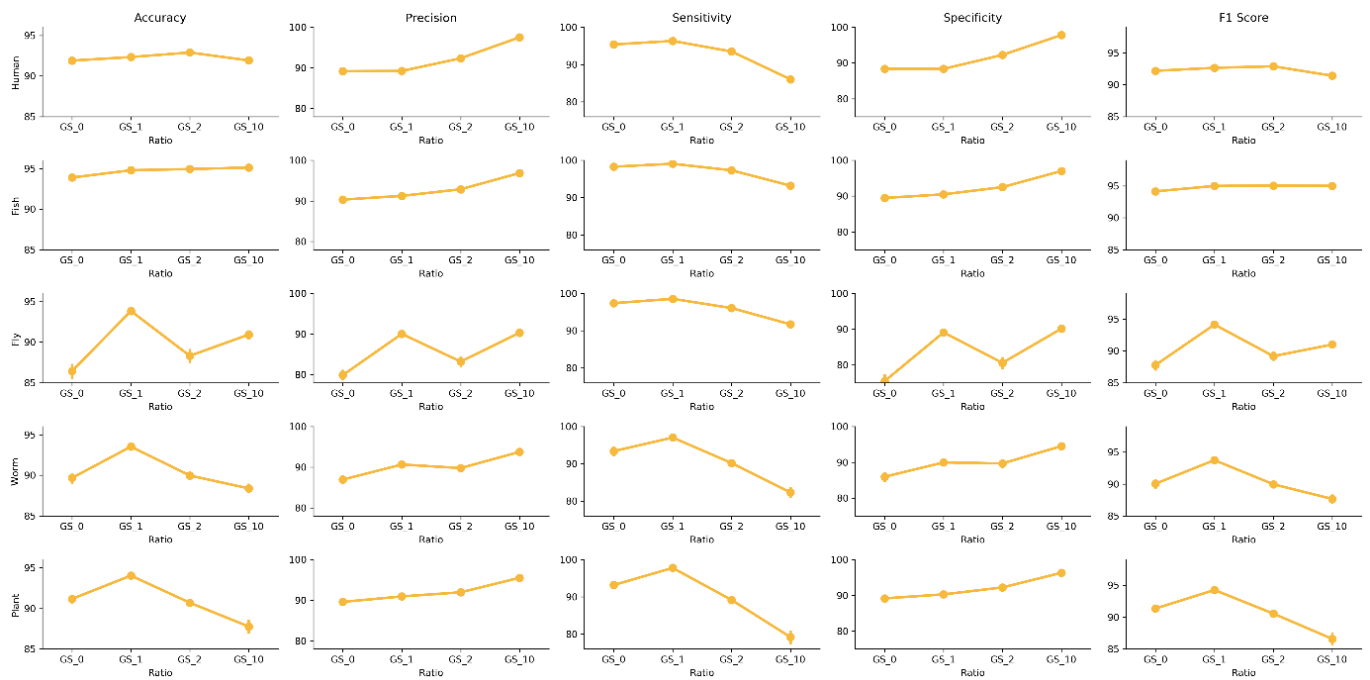

## B) Acceptor

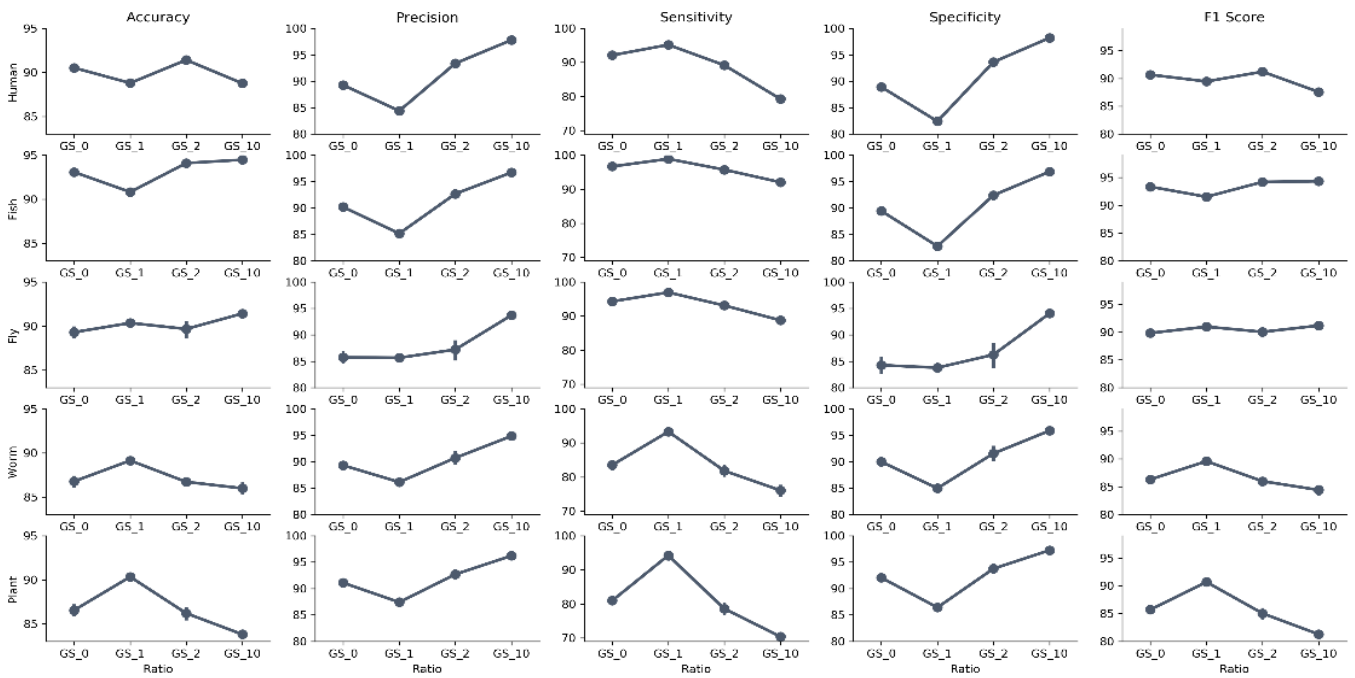

Figure S1 – Average performance for GS datasets and for A) donor and B) acceptor SS, on 5 different benchmarks (human, fish, fly, worm, plant). Five metrics are used to evaluate the performance: accuracy, precision, sensibility, specificity and F1 score. AS/GS\_0 = positive/negative ratio of 1:1 with only FP sequences in negative subset; AS/GS\_1 = positive/negative ratio of 1:1 with exon, intron and FP sequences; AS/GS\_2 = positive/negative

ratio of 1:2 with only FP sequences in negative subset; AS/GS\_10 = positive/negative ratio of 1:10 with only FP sequences in negative subset.

|                 |                    | <b>1</b> | <b>2</b> | <b>3</b> | <b>4</b> | <b>5</b> | <b>6</b> | <b>7</b> | <b>8</b> | <b>9</b> | <b>10</b> | <b>Avg</b> | <b>Std. Dev</b> |
|-----------------|--------------------|----------|----------|----------|----------|----------|----------|----------|----------|----------|-----------|------------|-----------------|
| <b>Donor</b>    | <b>Accuracy</b>    | 95.71    | 95.59    | 95.09    | 95.53    | 95.18    | 95.02    | 95.55    | 95.36    | 95.48    | 94.86     | 95.34      | 0.28            |
|                 | <b>Precision</b>   | 93.40    | 92.87    | 92.88    | 91.69    | 92.67    | 92.49    | 92.60    | 91.39    | 93.59    | 91.39     | 92.50      | 0.78            |
|                 | <b>Sensitivity</b> | 98.50    | 98.48    | 98.56    | 98.38    | 98.12    | 98.21    | 98.22    | 98.36    | 98.68    | 97.60     | 98.31      | 0.30            |
|                 | <b>Specificity</b> | 92.91    | 92.94    | 92.68    | 91.20    | 92.25    | 92.00    | 92.06    | 91.08    | 93.08    | 90.93     | 92.11      | 0.81            |
|                 | <b>F1 score</b>    | 95.88    | 95.59    | 95.64    | 94.92    | 95.32    | 95.27    | 95.33    | 94.75    | 96.07    | 94.39     | 95.32      | 0.52            |
| <b>Acceptor</b> | <b>Accuracy</b>    | 94.41    | 94.00    | 94.46    | 94.25    | 94.41    | 94.00    | 94.23    | 94.21    | 94.12    | 93.80     | 94.19      | 0.21            |
|                 | <b>Precision</b>   | 91.77    | 91.49    | 91.58    | 91.64    | 92.58    | 91.52    | 92.36    | 91.42    | 91.51    | 91.45     | 91.73      | 0.40            |
|                 | <b>Sensitivity</b> | 97.87    | 97.17    | 97.80    | 97.30    | 96.73    | 97.00    | 96.77    | 97.76    | 97.04    | 96.58     | 97.20      | 0.47            |
|                 | <b>Specificity</b> | 90.78    | 90.77    | 91.18    | 91.25    | 92.04    | 91.00    | 91.55    | 90.54    | 91.28    | 91.04     | 91.14      | 0.43            |
|                 | <b>F1 score</b>    | 94.72    | 94.25    | 94.59    | 94.38    | 94.61    | 94.18    | 94.51    | 94.49    | 94.20    | 93.95     | 94.39      | 0.24            |

Table S3 - Optimized Spliceator model performance averaged over 10 experiments. Optimal model corresponds to the GS\_1 dataset, with input sequence length of 200 nt, high quality positive sequences, a balanced number of positive and negative sequences and heterogeneous negative examples (exon, intron and FP sequences).

| Gene Name           | Gene length (nt) | No. of orthologous sequences | Gene Name           | Gene length (nt) | No. of orthologous sequences |
|---------------------|------------------|------------------------------|---------------------|------------------|------------------------------|
| <i>ARL6</i>         | <b>36709</b>     | <b>119</b>                   | <i>LMOD3</i>        | 16161            | 43                           |
| <i>BBIP1</i>        | <b>20545</b>     | <b>36</b>                    | <i>LZTL1</i>        | <b>92727</b>     | <b>79</b>                    |
| <i>BBS1</i>         | <b>23008</b>     | <b>127</b>                   | <i>MEG10</i>        | 133936           | 41                           |
| <i>BBS10</i>        | <b>3969</b>      | <b>37</b>                    | <i>MKKS</i>         | <b>33214</b>     | <b>54</b>                    |
| <i>BBS12</i>        | <b>12241</b>     | <b>44</b>                    | <i>MKS1</i>         | <b>14169</b>     | <b>90</b>                    |
| <i>BBS2</i>         | <b>53252</b>     | <b>119</b>                   | <i>MTM1</i>         | 104704           | 39                           |
| <i>BBS4</i>         | <b>52297</b>     | <b>130</b>                   | <i>MY18B</i>        | 288898           | 37                           |
| <i>BBS5</i>         | <b>27176</b>     | <b>125</b>                   | <i>MYPC3</i>        | 21306            | 42                           |
| <i>BBS7</i>         | <b>46058</b>     | <b>117</b>                   | <i>MYPN</i>         | 105896           | 44                           |
| <i>BIN1</i>         | 59329            | 40                           | <i>NEBU</i>         | 247397           | 43                           |
| <i>CELN</i>         | 18029            | 39                           | <b><i>PTHB1</i></b> | <b>476825</b>    | <b>131</b>                   |
| <b><i>CH037</i></b> | <b>24283</b>     | <b>66</b>                    | <i>RASH</i>         | 5046             | 36                           |
| <i>CNTN1</i>        | 379977           | 41                           | <i>ROA1</i>         | 6896             | 30                           |
| <i>COF2</i>         | 8055             | 47                           | <i>RYR1</i>         | 153591           | 27                           |
| <i>DYN2</i>         | 115410           | 42                           | <b><i>SDCG8</i></b> | <b>244037</b>    | <b>54</b>                    |
| <b><i>FRITZ</i></b> | <b>467417</b>    | <b>71</b>                    | <i>SPEG</i>         | 63442            | 45                           |
| <i>HACD1</i>        | 28346            | 36                           | <i>SPTN1</i>        | 110224           | 32                           |
| <i>HUWE1</i>        | 122012           | 31                           | <i>TMM8C</i>        | 10361            | 38                           |
| <b><i>IFT27</i></b> | <b>18055</b>     | <b>85</b>                    | <i>TPM2</i>         | 9029             | 14                           |
| <b><i>IFT74</i></b> | <b>115892</b>    | <b>131</b>                   | <i>TPM3</i>         | 39345            | 24                           |
| <i>KBTBD</i>        | 1377             | 45                           | <b><i>TRI32</i></b> | <b>13999</b>     | <b>40</b>                    |
| <i>KLH40</i>        | 7026             | 50                           | <b><i>TTC8</i></b>  | <b>56926</b>     | <b>138</b>                   |
| <i>KLH41</i>        | 16561            | 42                           |                     |                  |                              |

Table S4 – 45 Human reference genes used in the G3PO+ dataset (original G3PO genes are in bold and the others genes correspond to the extended set G3PO+ )

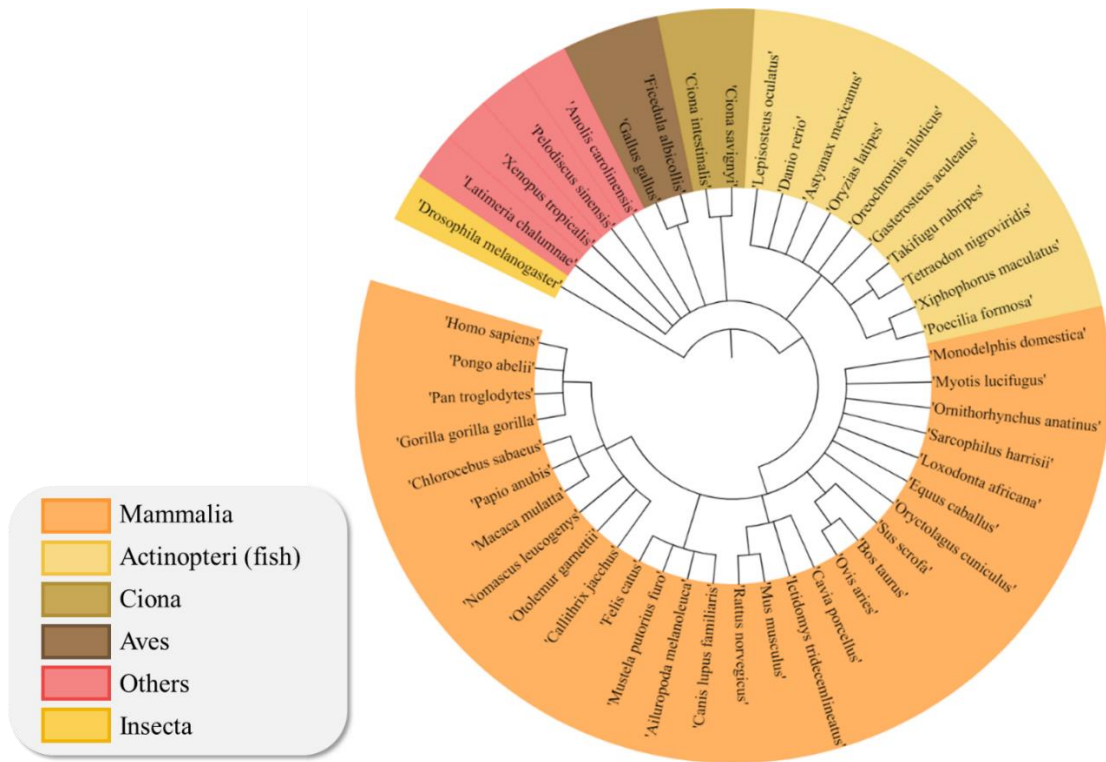

Figure S2 – List of metazoans added in G3PO+ (Phylogenetic tree built with iTOL v5) (Letunic and Bork, 2021).

| Length        | Canonical   |             |             |             |
|---------------|-------------|-------------|-------------|-------------|
|               | Donor       |             | Acceptor    |             |
|               | AS          | GS          | AS          | GS          |
| 20            | 9982        | 8519        | 10440       | 9091        |
| 80            | 11348       | 10159       | 11564       | 10463       |
| 140           | 11551       | 10440       | 11694       | 10751       |
| 200           | 11619       | 10553       | 11736       | 10873       |
| 400           | 11675       | 10708       | 11780       | 11013       |
| 600           | 12000       | 10736       | 11788       | 11036       |
| Non-canonical |             |             |             |             |
| 20            | 278 (2.71%) | 209 (2.39%) | 211 (1.98%) | 143 (1.55%) |
| 80            | 306 (2.63%) | 234 (2.25%) | 212 (1.80%) | 143 (1.35%) |
| 140           | 310 (2.61%) | 236 (2.21%) | 212 (1.78%) | 143 (1.31%) |
| 200           | 310 (2.60%) | 237 (2.20%) | 212 (1.77%) | 143 (1.30%) |
| 400           | 310 (2.59%) | 237 (2.17%) | 212 (1.77%) | 143 (1.28%) |
| 600           | 310 (2.52%) | 237 (2.16%) | 212 (1.77%) | 143 (1.28%) |
| Total         |             |             |             |             |
| 20            | 10260       | 8728        | 10651       | 9234        |
| 80            | 11654       | 10393       | 11776       | 10606       |
| 140           | 11861       | 10676       | 11906       | 10894       |
| 200           | 11929       | 10790       | 11948       | 11016       |
| 400           | 11985       | 10945       | 11992       | 11156       |
| 600           | 12310       | 10973       | 12000       | 11179       |

Table S5 – Number of canonical and non-canonical sequences for AS and GS positive datasets for each input sequence length and for each SS (donor and acceptor).

| <b>[A] DONOR</b> |                    | <b>Set</b> | <b>1</b> | <b>2</b> | <b>3</b> | <b>4</b> | <b>5</b> | <b>6</b> | <b>7</b> | <b>8</b> | <b>9</b> | <b>10</b> | <b>Avg.</b> |
|------------------|--------------------|------------|----------|----------|----------|----------|----------|----------|----------|----------|----------|-----------|-------------|
| AS_0             | Negative sequences | Train      | 9649     | 9629     | 9596     | 9578     | 9583     | 9673     | 9636     | 9553     | 9649     | 9639      | 9619        |
|                  |                    | Test       | 2350     | 2370     | 2403     | 2421     | 2416     | 2326     | 2363     | 2446     | 2350     | 2360      | 2381        |
|                  | Positive sequences | Train      | 9550     | 9570     | 9603     | 9621     | 9616     | 9526     | 9563     | 9646     | 9550     | 9560      | 9581        |
|                  |                    | Test       | 2450     | 2430     | 2397     | 2379     | 2384     | 2474     | 2437     | 2354     | 2450     | 2440      | 2420        |
| AS_1             | Negative sequences | Train      | 9562     | 9555     | 9592     | 9581     | 9572     | 9634     | 9599     | 9605     | 9582     | 9590      | 9587        |
|                  |                    | Test       | 2438     | 2445     | 2408     | 2419     | 2428     | 2366     | 2401     | 2395     | 2418     | 2410      | 2413        |
|                  | Positive sequences | Train      | 9635     | 9642     | 9607     | 9618     | 9626     | 9566     | 9601     | 9594     | 9617     | 9609      | 9612        |
|                  |                    | Test       | 2362     | 2355     | 2392     | 2381     | 2372     | 2434     | 2399     | 2405     | 2382     | 2390      | 2387        |
| AS_2             | Negative sequences | Train      | 19203    | 19130    | 19139    | 19157    | 19147    | 19225    | 19169    | 19170    | 19192    | 19175     | 19171       |
|                  |                    | Test       | 4794     | 4868     | 4858     | 4840     | 4850     | 4772     | 4829     | 4828     | 4805     | 4822      | 4827        |
|                  | Positive sequences | Train      | 9594     | 9668     | 9658     | 9640     | 9650     | 9572     | 9629     | 9628     | 9605     | 9622      | 9627        |
|                  |                    | Test       | 2406     | 2332     | 2342     | 2360     | 2350     | 2428     | 2371     | 2372     | 2395     | 2378      | 2373        |
| AS_10            | Negative sequences | Train      | 95992    | 95956    | 95942    | 95986    | 96081    | 95959    | 95908    | 95946    | 95950    | 95984     | 95970       |
|                  |                    | Test       | 23985    | 24019    | 24031    | 23993    | 23893    | 24016    | 24066    | 24032    | 24021    | 23989     | 24005       |
|                  | Positive sequences | Train      | 9589     | 9624     | 9636     | 9597     | 9498     | 9621     | 9671     | 9636     | 9626     | 9594      | 9609        |
|                  |                    | Test       | 2411     | 2376     | 2364     | 2403     | 2502     | 2379     | 2329     | 2364     | 2374     | 2406      | 2391        |
| GS_0             | Negative sequences | Train      | 8799     | 8831     | 8760     | 8734     | 8855     | 8817     | 8803     | 8795     | 8834     | 8820      | 8805        |
|                  |                    | Test       | 2201     | 2169     | 2240     | 2266     | 2145     | 2183     | 2197     | 2205     | 2166     | 2180      | 2195        |
|                  | Positive sequences | Train      | 8779     | 8747     | 8818     | 8844     | 8723     | 8761     | 8775     | 8783     | 8744     | 8758      | 8773        |
|                  |                    | Test       | 2194     | 2226     | 2155     | 2129     | 2250     | 2212     | 2198     | 2190     | 2229     | 2215      | 2200        |
| GS_1             | Negative sequences | Train      | 8746     | 8779     | 8755     | 8798     | 8759     | 8823     | 8808     | 8775     | 8819     | 8754      | 8782        |
|                  |                    | Test       | 2254     | 2221     | 2245     | 2202     | 2241     | 2177     | 2192     | 2225     | 2181     | 2246      | 2218        |
|                  | Positive sequences | Train      | 8831     | 8797     | 8823     | 8780     | 8818     | 8755     | 8770     | 8801     | 8757     | 8822      | 8795        |
|                  |                    | Test       | 2141     | 2174     | 2150     | 2193     | 2154     | 2218     | 2203     | 2169     | 2213     | 2149      | 2176        |
| GS_2             | Negative sequences | Train      | 17548    | 17600    | 17550    | 17580    | 17587    | 17668    | 17585    | 17576    | 17613    | 17559     | 17587       |
|                  |                    | Test       | 4452     | 4400     | 4450     | 4420     | 4413     | 4332     | 4415     | 4424     | 4387     | 4441      | 4413        |
|                  | Positive sequences | Train      | 8830     | 8778     | 8828     | 8798     | 8791     | 8710     | 8793     | 8802     | 8765     | 8819      | 8791        |
|                  |                    | Test       | 2143     | 2195     | 2145     | 2175     | 2182     | 2263     | 2180     | 2171     | 2208     | 2154      | 2182        |
| GS_10            | Negative sequences | Train      | 88064    | 87974    | 88048    | 87986    | 88037    | 87965    | 88019    | 87890    | 88099    | 88023     | 88011       |
|                  |                    | Test       | 21936    | 22026    | 21952    | 22014    | 21963    | 22035    | 21981    | 22110    | 21901    | 21977     | 21990       |
|                  | Positive sequences | Train      | 8714     | 8804     | 8730     | 8792     | 8741     | 8813     | 8759     | 8888     | 8679     | 8755      | 8768        |
|                  |                    | Test       | 2259     | 2169     | 2243     | 2181     | 2232     | 2160     | 2214     | 2085     | 2294     | 2218      | 2206        |

Table S6A – Number of positive and negative sequences in the 10 training and test sets for each AS and GS dataset and for donor SS.

| <b>[B] ACCEPTOR</b> |                    | <b>Set</b> | <b>1</b> | <b>2</b> | <b>3</b> | <b>4</b> | <b>5</b> | <b>6</b> | <b>7</b> | <b>8</b> | <b>9</b> | <b>10</b> | <b>Avg.</b> |
|---------------------|--------------------|------------|----------|----------|----------|----------|----------|----------|----------|----------|----------|-----------|-------------|
| AS_0                | Negative sequences | Train      | 9536     | 9614     | 9627     | 9598     | 9601     | 9596     | 9616     | 9634     | 9648     | 9584      | 9605        |
|                     |                    | Test       | 2462     | 2385     | 2371     | 2401     | 2398     | 2403     | 2383     | 2365     | 2351     | 2415      | 2393        |
|                     | Positive sequences | Train      | 9662     | 9585     | 9571     | 9601     | 9598     | 9603     | 9583     | 9565     | 9551     | 9615      | 9593        |
|                     |                    | Test       | 2338     | 2415     | 2429     | 2399     | 2402     | 2397     | 2417     | 2435     | 2449     | 2385      | 2407        |
| AS_1                | Negative sequences | Train      | 9627     | 9558     | 9619     | 9577     | 9593     | 9605     | 9613     | 9630     | 9600     | 9628      | 9605        |
|                     |                    | Test       | 2373     | 2442     | 2381     | 2423     | 2407     | 2395     | 2387     | 2370     | 2400     | 2372      | 2395        |

|       |                    |       |       |       |       |       |       |       |       |       |       |       |       |
|-------|--------------------|-------|-------|-------|-------|-------|-------|-------|-------|-------|-------|-------|-------|
|       | Positive sequences | Train | 9573  | 9640  | 9580  | 9623  | 9607  | 9595  | 9587  | 9569  | 9600  | 9571  | 9595  |
|       |                    | Test  | 2427  | 2358  | 2419  | 2377  | 2393  | 2405  | 2413  | 2430  | 2400  | 2428  | 2405  |
| AS_2  | Negative sequences | Train | 19201 | 19231 | 19189 | 19204 | 19206 | 19169 | 19227 | 19231 | 19265 | 19231 | 19215 |
|       |                    | Test  | 4794  | 4765  | 4807  | 4793  | 4789  | 4829  | 4771  | 4767  | 4733  | 4767  | 4782  |
|       | Positive sequences | Train | 9595  | 9565  | 9607  | 9593  | 9590  | 9629  | 9571  | 9567  | 9533  | 9567  | 9582  |
|       |                    | Test  | 2405  | 2435  | 2393  | 2407  | 2410  | 2371  | 2429  | 2433  | 2467  | 2433  | 2418  |
| AS_10 | Negative sequences | Train | 95966 | 96014 | 95909 | 95972 | 95924 | 96066 | 96019 | 96018 | 95986 | 95993 | 95987 |
|       |                    | Test  | 24012 | 23970 | 24072 | 24012 | 24052 | 23914 | 23959 | 23966 | 23996 | 23989 | 23994 |
|       | Positive sequences | Train | 9616  | 9573  | 9675  | 9615  | 9656  | 9518  | 9563  | 9569  | 9599  | 9592  | 9598  |
|       |                    | Test  | 2384  | 2427  | 2325  | 2385  | 2344  | 2482  | 2437  | 2431  | 2401  | 2408  | 2402  |
| GS_0  | Negative sequences | Train | 8812  | 8776  | 8775  | 8771  | 8744  | 8799  | 8830  | 8791  | 8847  | 8806  | 8795  |
|       |                    | Test  | 2188  | 2224  | 2225  | 2229  | 2256  | 2201  | 2170  | 2209  | 2153  | 2194  | 2205  |
|       | Positive sequences | Train | 8931  | 8967  | 8968  | 8972  | 8999  | 8944  | 8913  | 8952  | 8896  | 8937  | 8948  |
|       |                    | Test  | 2248  | 2212  | 2211  | 2207  | 2180  | 2235  | 2266  | 2227  | 2283  | 2242  | 2231  |
| GS_1  | Negative sequences | Train | 8820  | 8832  | 8782  | 8761  | 8830  | 8802  | 8815  | 8780  | 8828  | 8846  | 8810  |
|       |                    | Test  | 2180  | 2168  | 2218  | 2239  | 2170  | 2198  | 2185  | 2220  | 2172  | 2154  | 2190  |
|       | Positive sequences | Train | 8923  | 8910  | 8960  | 8981  | 8912  | 8941  | 8927  | 8961  | 8915  | 8896  | 8933  |
|       |                    | Test  | 2256  | 2268  | 2218  | 2197  | 2266  | 2238  | 2251  | 2216  | 2264  | 2282  | 2246  |
| GS_2  | Negative sequences | Train | 17590 | 17580 | 17591 | 17626 | 17578 | 17520 | 17612 | 17579 | 17619 | 17629 | 17592 |
|       |                    | Test  | 4410  | 4420  | 4409  | 4374  | 4422  | 4480  | 4388  | 4421  | 4381  | 4371  | 4408  |
|       | Positive sequences | Train | 8953  | 8963  | 8952  | 8917  | 8965  | 9023  | 8931  | 8964  | 8924  | 8914  | 8951  |
|       |                    | Test  | 2226  | 2216  | 2227  | 2262  | 2214  | 2156  | 2248  | 2215  | 2255  | 2265  | 2228  |
| GS_10 | Negative sequences | Train | 87973 | 88023 | 87923 | 87921 | 87967 | 88008 | 88013 | 88009 | 88048 | 88008 | 87989 |
|       |                    | Test  | 22027 | 21977 | 22077 | 22079 | 22033 | 21992 | 21987 | 21991 | 21952 | 21992 | 22011 |
|       | Positive sequences | Train | 8970  | 8920  | 9020  | 9022  | 8976  | 8935  | 8930  | 8934  | 8895  | 8935  | 8954  |
|       |                    | Test  | 2209  | 2259  | 2159  | 2157  | 2203  | 2244  | 2249  | 2245  | 2284  | 2244  | 2225  |

Table S6B – Number of positive and negative sequences in the 10 training and test sets for each AS and GS dataset and for acceptor SS.

## References

Letunic,I. and Bork,P. (2021) Interactive Tree Of Life (iTOL) v5: an online tool for phylogenetic tree display and annotation. *Nucleic Acids Research*.
